# Supplementary material for: Ecofriendly Biopolymer-Based Nanocomposite Films with Improved Photo-Oxidative Resistance
Source: MDPI journal article supplement (doi:10.3390/ma15165778), 2022-08-21
Supplement: s1 [file s1]

## Supplementari Information

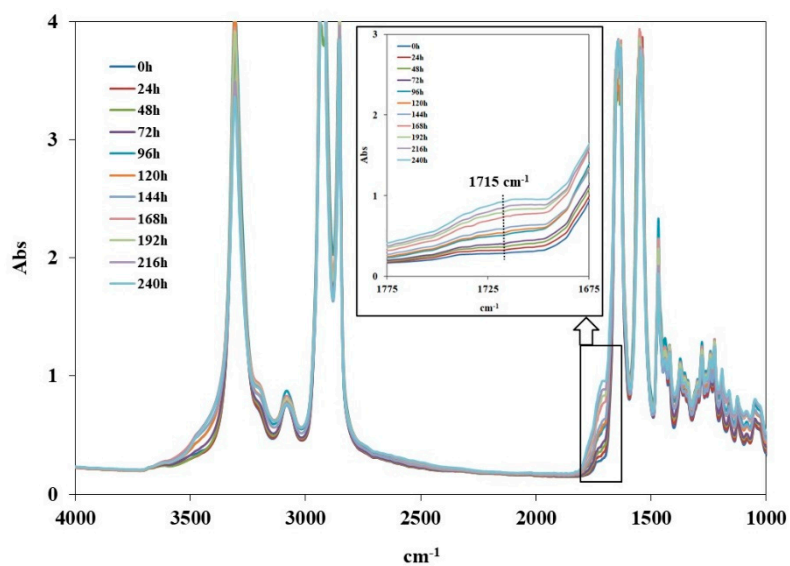

**Figure S1.** FTIR spectra collected at different exposure time of neat PA11

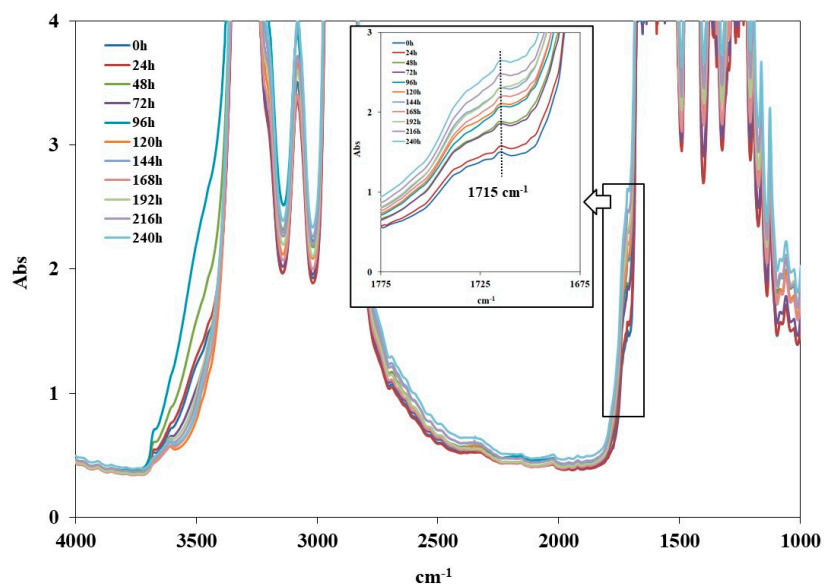

**Figure S2.** FTIR spectra collected at different exposure time of PA11/LDH

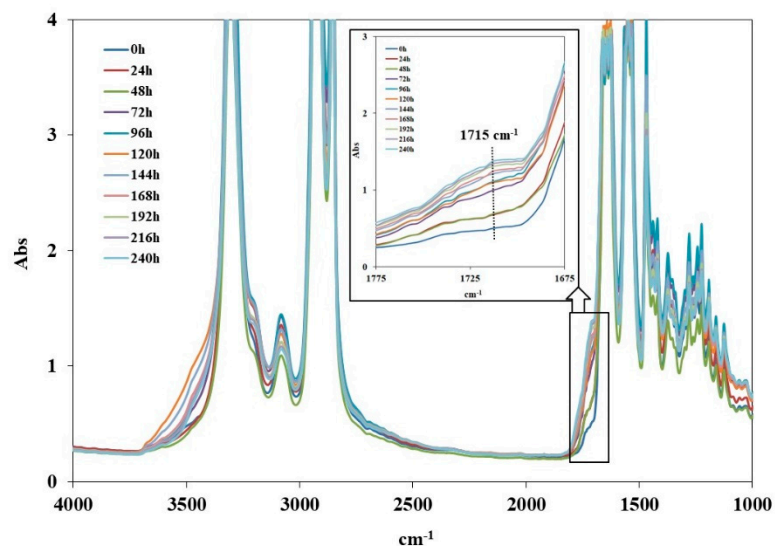

**Figure S3.** FTIR spectra collected at different exposure time of PA11/LDH-HALS1

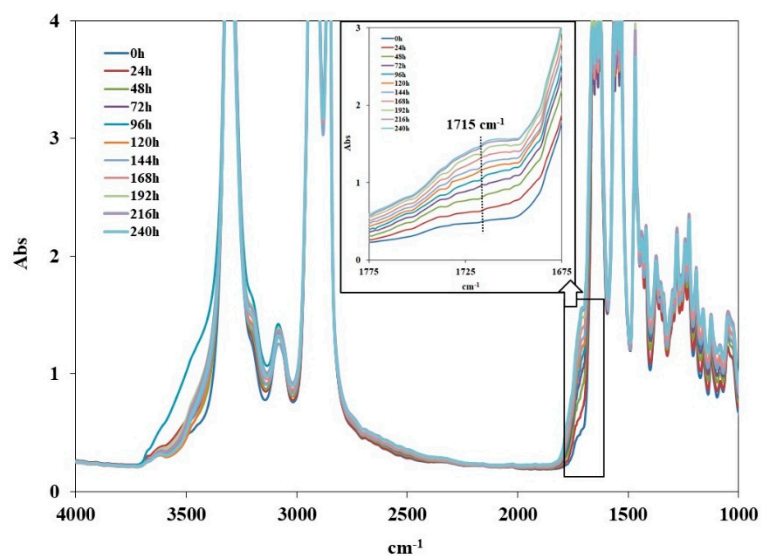

**Figure S4.** FTIR spectra collected at different exposure time of PA11/LDH-HALS2

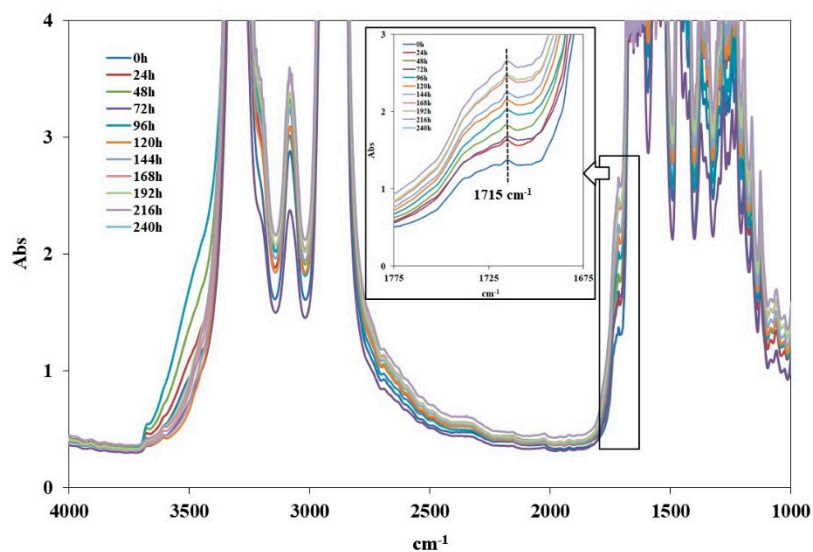

**Figure S5.** FTIR spectra collected at different exposure time of PA11/LDH-HALS<sub>added</sub>
